# Supplementary material for: The Mitochondrial Antioxidant Sirtuin3 Cooperates with Lipid Metabolism to Safeguard Neurogenesis in Aging and Depression
Source: MDPI journal article supplement (doi:10.3390/cells11010090), 2021-12-29
Supplement: s1 [file s1]

**Article: The mitochondrial antioxidant Sirtuin3 cooperates with lipid metabolism to safeguard neurogenesis in ageing and depression**

**Authors: Sónia Sá Santos, João B. Moreira, Márcia Costa, Rui S. Rodrigues, Ana M. Sebastião, Sara Xapelli and Susana Solá**

## Supplementary Figure

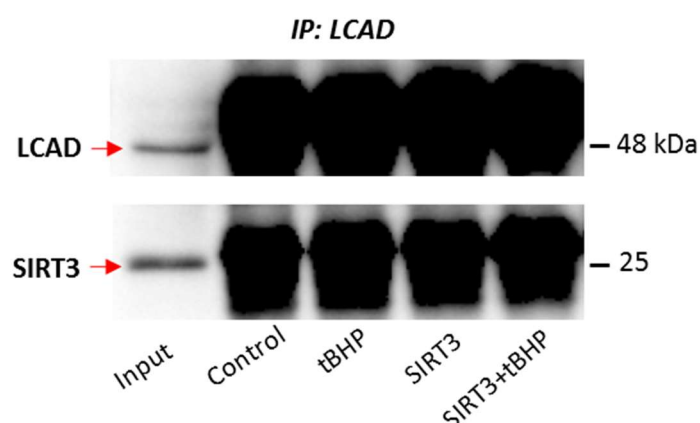

**Figure S1. Detection of LCAD and SIRT3 proteins in input sample for the immunoprecipitation assays.** Immunoblots correspond to Figure 3A for cell lysates immunoprecipitated with anti-LCAD antibody (lanes 2-5). Input sample (lane 1) corresponds to non-immunoprecipitated control group lysate. Abbreviations: IP, Immunoprecipitation; LCAD, long chain acyl-CoA dehydrogenase; tBHP, tert-butyl hydroperoxide.
